# Supplementary material
Source: HighWire-hosted journal article supplement (https://gh.bmj.com/content/8/2/e010996)
Supplement: inline-supplementary-material-5 [file inline-supplementary-material-5.pdf]

**Supplementary file 4 – Participants' characteristics**

| <b>Informants' home organisations</b> | <b>Specification of the organisation</b>                                                                                 | <b>Number of informants</b> | <b>Informants' function</b>                           |
|---------------------------------------|--------------------------------------------------------------------------------------------------------------------------|-----------------------------|-------------------------------------------------------|
| Ministry of Health (MoH)              | National Agency for Health Security (ANSS)                                                                               | 1                           | Representative                                        |
| Health regions                        | Conakry, Faranah, Mamou, Boké and Labé                                                                                   | 5                           | Regional Health Director                              |
| Health districts                      | Dixinn, Ratoma, Kaloum, Matam, Matoto, Dalaba, Dinguiraye, Kouroussa, Mandiana, Forécariah, Dubréka, Guéckédou and Coyah | 13                          | District Medical Officers                             |
| Health committees                     | Mangala (Guéckédou), Konso (Dabola), Konindou (Dabola), Banko (Dabola), Madina (Kissidougou)                             | 5                           | Community representatives and Heads of health centres |
| MoH's partners                        | WHO, UNICEF, USAID, UNFPA, CRS, Jhpiego and Amref Health Africa                                                          | 9                           | Representatives                                       |
| Total number of informants            |                                                                                                                          | 33                          |                                                       |
